# Supplementary material for: A new method for early diagnosis of liver cancer using a biosensor embedded in an alginate polymer thin film
Source: Royal Society of Chemistry journal article supplement (doi:10.1039/d2tc00209d), 2022-01-01
Supplement: d2tc00209d1.pdf [file d2tc00209d1.pdf]

Supplementary data

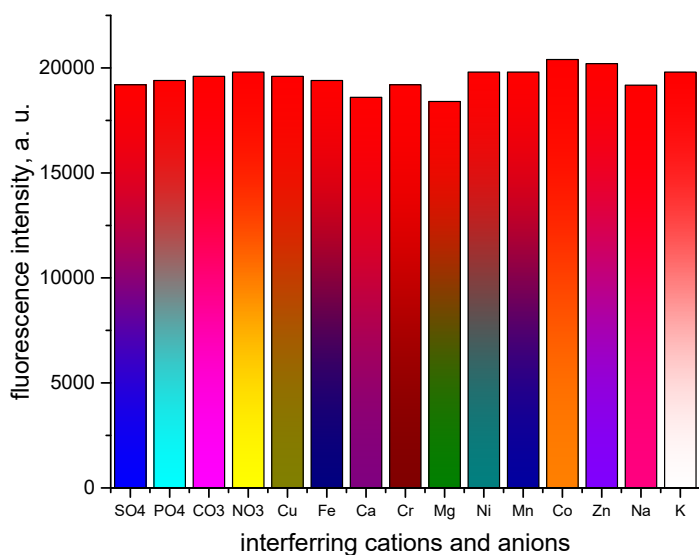

Effect of anions and cations interference on the detection of AFP by binaphthol biosensor, there is no quenching for the fluorescence intensity of the biosensor. There is no interference by different cations and anions solution.

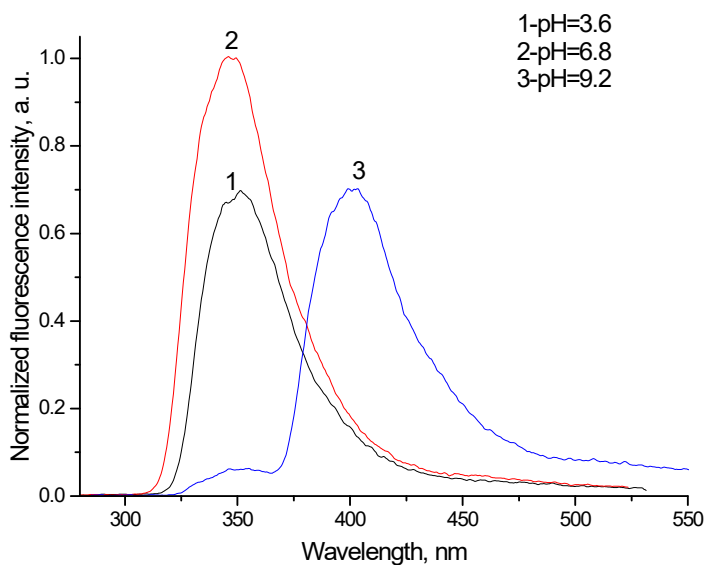

Fluorescence emission spectra of  $2 \times 10^{-5} \text{ mol L}^{-1}$  of binaphthol at different pH. The more preferred pH is 6.8 at which high fluorescence intensity of the biosensor is obtained. All experiments were done in aqueous solutions (distilled water)
